# Supplementary material for: Regulation of the diabetic immune microenvironment by metformin-loaded strontium-doped mesoporous bioactive glass facilitates bone regeneration
Source: Royal Society of Chemistry journal article supplement (doi:10.1039/d4tb01778a), 2025-01-01
Supplement: d4tb01778a1.pdf [file d4tb01778a1.pdf]

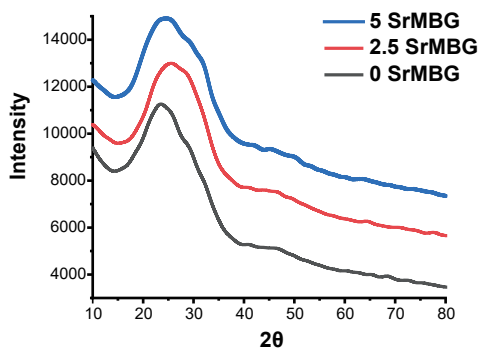

**Supplementary figure 1** XRD analysis of SrMBG powder.

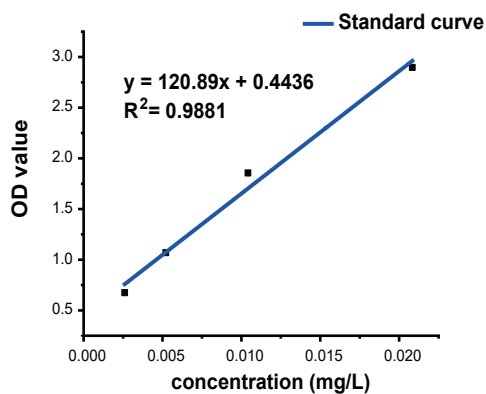

**Supplementary figure 2** Standard curve of MET solution.

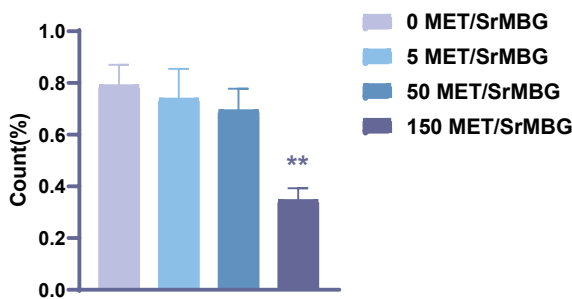

**Supplementary figure 3** The percentage of ROS positive macrophages in fluorescence image. (\*\*represent  $p < 0.01$  when compared with 0 MET/SrMBG.)
