# Supplementary material for: Regulation of the diabetic immune microenvironment by metformin-loaded strontium-doped mesoporous bioactive glass facilitates bone regeneration
Source: Royal Society of Chemistry journal article supplement (doi:10.1039/d4tb01778a), 2025-01-01
Supplement: d4tb01778a2.pdf [file d4tb01778a2.pdf]

## Supplementary table 1

Nitrogen adsorption-desorption isotherm analysis of SrMBG powder

| Parameters        | 0 SrMBG                     | 2.5 SrMBG                   | 5 SrMBG                     |
|-------------------|-----------------------------|-----------------------------|-----------------------------|
| BET Surface Area  | 399.2790 m <sup>2</sup> /g  | 504.3611 m <sup>2</sup> /g  | 515.9882 m <sup>2</sup> /g  |
| Pore Volume       | 0.799429 cm <sup>3</sup> /g | 0.735730 cm <sup>3</sup> /g | 0.694634 cm <sup>3</sup> /g |
| Average Pore Size | 6.9131 nm                   | 6.0546 nm                   | 5.3569 nm                   |

## Supplementary table 2

Primer sequences of macrophage polarization related gene

| Gene  | Primer sequences (5'-3')                                         |
|-------|------------------------------------------------------------------|
| GAPDH | Forward: ACCCAGAAGACTGTGGATGG<br>Reverse: CACATTGGGGGTAGGAACAC   |
| iNOS  | Forward: CACCAAGCTGAACTTGAGCG<br>Reverse: CGTGGCTTTGGGCTCCTC     |
| IL-6  | Forward: CCTCTGGTCTTCTGGAGTACC<br>Reverse: GGAGAGCATTGGAAATTGGGG |
| IL-10 | Forward: GAGAAGCATGCCCCAGAAATC<br>Reverse: GAGAAATCGATGACAGCGCC  |
| CD206 | Forward: TGCCTACTGCCTGCCCTAATC<br>Reverse: GTCCCATCGCTCCACTCAAAG |

## Supplementary table 3

Primer sequences of osteogenesis related gene

| Gene  | Primer sequences(5'-3')                                             |
|-------|---------------------------------------------------------------------|
| GAPDH | Forward: GCCTTCCGTGTTCTACC<br>Reverse: AGAGTGGGAGTTGCTGTTG          |
| ALP   | Forward: GCGTCCATGAGCAGAACTACATC<br>Reverse: CAGGCACAGTGGTCAAGGTTGG |
| RUNX2 | Forward: GACTGTGGTTACCGTCATGGC<br>Reverse: ACTTGGTTTTTCATAACAGCGGA  |
